# Supplementary material for: A Key for the Microhistological Determination of Plant Fragments Consumed by Carpathian Forest Cervids
Source: MDPI journal article supplement (doi:10.3390/f12091229), 2021-09-09
Supplement: s1 [file s1]

## SUPPLEMENTARY MATERIAL.

**Table S1.** A list of vascular plant species (except for moss) and their parts (leaf, stem, bud, bark and wood, fruit, grain) collected within Western Carpathians, Slovakia and used as a reference material for the microhistological key.

| Species                        | Division      | Class     | Family                 | Leaf | Stem | Bud | Bark/<br>Wood | Fruit/<br>Grain | Category* |
|--------------------------------|---------------|-----------|------------------------|------|------|-----|---------------|-----------------|-----------|
| <i>Abies alba</i>              | Pinophyta     | Pinopsida | <i>Pinaceae</i>        | X    |      |     | X             |                 | 4,5       |
| <i>Acer campestre</i>          | Magnoliophyta | Eudicots  | <i>Sapindaceae</i>     | X    |      | X   | X             |                 | 2,5       |
| <i>Aegopodium podagraria</i>   | Magnoliophyta | Eudicots  | <i>Apiaceae</i>        | X    | X    |     |               |                 | 2         |
| <i>Agrostis stolonifera</i>    | Magnoliophyta | Monocots  | <i>Poaceae</i>         | X    | X    |     |               |                 | 1         |
| <i>Allium oleraceum</i>        | Magnoliophyta | Monocots  | <i>Amaryllidaceae</i>  | X    | X    |     |               |                 | 2         |
| <i>Alnus glutinosa</i>         | Magnoliophyta | Eudicots  | <i>Betulaceae</i>      | X    | X    |     |               |                 | 2         |
| <i>Anemone nemorosa</i>        | Magnoliophyta | Eudicots  | <i>Ranunculaceae</i>   | X    | X    |     |               |                 | 2         |
| <i>Angelica sylvestris</i>     | Magnoliophyta | Eudicots  | <i>Apiaceae</i>        | X    | X    |     |               |                 | 2         |
| <i>Arctium lappa</i>           | Magnoliophyta | Eudicots  | <i>Asteraceae</i>      | X    | X    |     |               |                 | 2         |
| <i>Arctostaphylos uva-ursi</i> | Magnoliophyta | Eudicots  | <i>Ericaceae</i>       | X    | X    |     |               |                 | 3         |
| <i>Artemisia vulgaris</i>      | Magnoliophyta | Eudicots  | <i>Asteraceae</i>      | X    | X    |     |               |                 | 2         |
| <i>Astragalus glycyphyllos</i> | Magnoliophyta | Eudicots  | <i>Fabaceae</i>        | X    | X    |     |               |                 | 2         |
| <i>Athyrium filix-femina</i>   | Pteridophyta  | Eudicots  | <i>Athyriaceae</i>     | X    | X    |     |               |                 | 6         |
| <i>Betonica officinalis</i>    | Magnoliophyta | Eudicots  | <i>Lamiaceae</i>       | X    | X    |     |               |                 | 2         |
| <i>Calamagrostis epigejos</i>  | Magnoliophyta | Monocots  | <i>Poaceae</i>         | X    | X    |     |               |                 | 1         |
| <i>Caltha palustris</i>        | Magnoliophyta | Eudicots  | <i>Ranunculaceae</i>   | X    | X    |     |               |                 | 2         |
| <i>Capsella bursa-pastoris</i> | Magnoliophyta | Eudicots  | <i>Brassicaceae</i>    | X    | X    |     |               |                 | 2         |
| <i>Carduus glaucinus</i>       | Magnoliophyta | Eudicots  | <i>Asteraceae</i>      | X    | X    |     |               |                 | 2         |
| <i>Carex digitata</i>          | Magnoliophyta | Monocots  | <i>Cyperaceae</i>      | X    | X    |     |               |                 | 1         |
| <i>Carpinus betulus</i>        | Magnoliophyta | Eudicots  | <i>Betulaceae</i>      | X    |      |     |               |                 | 2         |
| <i>Cirsium arvense</i>         | Magnoliophyta | Eudicots  | <i>Asteraceae</i>      | X    | X    |     |               |                 | 2         |
| <i>Cirsium rivulare</i>        | Magnoliophyta | Eudicots  | <i>Asteraceae</i>      | X    | X    |     |               |                 | 2         |
| <i>Colchicum autumnale</i>     | Magnoliophyta | Monocots  | <i>Colchicaceae</i>    | X    | X    |     |               |                 | 2         |
| <i>Corylus avellana</i>        | Magnoliophyta | Eudicots  | <i>Betulaceae</i>      |      |      |     | X             |                 | 5         |
| <i>Deschampsia cespitosa</i>   | Magnoliophyta | Monocots  | <i>Poaceae</i>         | X    | X    |     |               |                 | 1         |
| <i>Dryopteris filix-mas</i>    | Pteridophyta  | Eudicots  | <i>Dryopteridaceae</i> | X    | X    |     |               |                 | 6         |
| <i>Echium vulgare</i>          | Magnoliophyta | Eudicots  | <i>Boraginaceae</i>    | X    | X    |     |               |                 | 2         |
| <i>Fagus sylvatica</i>         | Magnoliophyta | Eudicots  | <i>Fagaceae</i>        | X    |      | X   | X             | X               | 2,5,7     |
| <i>Festuca gigantea</i>        | Magnoliophyta | Monocots  | <i>Poaceae</i>         | X    | X    |     |               |                 | 1         |
| <i>Filipendula ulmaria</i>     | Magnoliophyta | Eudicots  | <i>Rosaceae</i>        | X    | X    |     |               |                 | 2         |
| <i>Fraxinus excelsior</i>      | Magnoliophyta | Eudicots  | <i>Oleaceae</i>        | X    |      |     | X             |                 | 2         |
| <i>Galium verum</i>            | Magnoliophyta | Eudicots  | <i>Rubiaceae</i>       | X    | X    |     |               |                 | 2         |
| <i>Genista tinctoria</i>       | Magnoliophyta | Eudicots  | <i>Fabaceae</i>        | X    | X    |     |               |                 | 2         |
| <i>Glechoma hederacea</i>      | Magnoliophyta | Eudicots  | <i>Lamiaceae</i>       | X    | X    |     |               |                 | 2         |
| <i>Hepatica nobilis</i>        | Magnoliophyta | Eudicots  | <i>Ranunculaceae</i>   | X    | X    |     |               |                 | 2         |

|                                |                |           |                         |   |   |   |     |
|--------------------------------|----------------|-----------|-------------------------|---|---|---|-----|
| <i>Holcus spp.</i>             | Magnoliophyta  | Monocots  | <i>Poaceae</i>          | X | X |   | 1   |
| <i>Hordeum vulgare</i>         | Magnoliophyta  | Monocots  | <i>Poaceae</i>          | X | X | X | 1,7 |
| <i>Hypericum perforatum</i>    | Magnoliophyta  | Eudicots  | <i>Hypericaceae</i>     | X | X |   | 2   |
| <i>Impatiens parviflora</i>    | Magnoliophyta  | Eudicots  | <i>Balsaminaceae</i>    | X | X |   | 2   |
| <i>Juncus conglomeratus</i>    | Magnoliophyta  | Monocots  | <i>Juncaceae</i>        | X | X |   | 1   |
| <i>Juncus effusus</i>          | Magnoliophyta  | Monocots  | <i>Juncaceae</i>        | X | X |   | 1   |
| <i>Juniperus communis</i>      | Pinophyta      | Pinopsida | <i>Cupressaceae</i>     | X |   | X | 3,5 |
| <i>Lamium purpureum</i>        | Magnoliophyta  | Eudicots  | <i>Lamiaceae</i>        | X | X |   | 2   |
| <i>Lathyrus niger</i>          | Magnoliophyta  | Eudicots  | <i>Fabaceae</i>         | X | X |   | 2   |
| <i>Lolium perenne</i>          | Magnoliophyta  | Monocots  | <i>Poaceae</i>          | X | X |   | 1   |
| <i>Luzula pilosa</i>           | Magnoliophyta  | Monocots  | <i>Juncaceae</i>        | X | X |   | 1   |
| <i>Luzula sylvatica</i>        | Magnoliophyta  | Monocots  | <i>Juncaceae</i>        | X | X |   | 1   |
| <i>Malus domestica</i>         | Magnoliophyta  | Eudicots  | <i>Rosaceae</i>         |   |   | X | 7   |
| <i>Melica uniflora</i>         | Magnoliophyta  | Monocots  | <i>Poaceae</i>          | X | X |   | 1   |
| <i>Mentha longifolia</i>       | Magnoliophyta  | Eudicots  | <i>Lamiaceae</i>        | X | X |   | 2   |
| <i>Milium effusum</i>          | Magnoliophyta  | Monocots  | <i>Poaceae</i>          | X | X |   | 1   |
| <i>Mnium spp.</i>              | Bryophyta      | Eudicots  | <i>Mniaceae</i>         | X | X |   | 6   |
| <i>Phegopteris connectilis</i> | Polypodiophyta | Eudicots  | <i>Thelypteridaceae</i> | X | X |   | 6   |
| <i>Phleum pratense</i>         | Magnoliophyta  | Monocots  | <i>Poaceae</i>          | X | X |   | 1   |
| <i>Picea abies</i>             | Pinophyta      | Pinopsida | <i>Pinaceae</i>         | X |   | X | 4,5 |
| <i>Pinus nigra</i>             | Pinophyta      | Pinopsida | <i>Pinaceae</i>         | X |   | X | 4,5 |
| <i>Poa nemoralis</i>           | Magnoliophyta  | Monocots  | <i>Poaceae</i>          | X | X |   | 1   |
| <i>Poa trivialis</i>           | Magnoliophyta  | Monocots  | <i>Poaceae</i>          | X | X |   | 1   |
| <i>Populus sp.</i>             | Magnoliophyta  | Eudicots  | <i>Salicaceae</i>       | X |   | X | 2,5 |
| <i>Prunus domestica</i>        | Magnoliophyta  | Eudicots  | <i>Rosaceae</i>         |   |   | X | 7   |
| <i>Prunus spinosa</i>          | Magnoliophyta  | Eudicots  | <i>Rosaceae</i>         |   |   | X | 5   |
| <i>Quercus cerris</i>          | Magnoliophyta  | Eudicots  | <i>Fagaceae</i>         | X |   | X | 2,7 |
| <i>Quercus petraea</i>         | Magnoliophyta  | Eudicots  | <i>Fagaceae</i>         | X |   | X | 2   |
| <i>Ranunculus repens</i>       | Magnoliophyta  | Eudicots  | <i>Ranunculaceae</i>    | X | X |   | 2   |
| <i>Robinia pseudoacacia</i>    | Magnoliophyta  | Eudicots  | <i>Fabaceae</i>         | X |   |   | 2   |
| <i>Rosa canina</i>             | Magnoliophyta  | Eudicots  | <i>Rosaceae</i>         | X | X | X | 3,7 |
| <i>Rubus caesius</i>           | Magnoliophyta  | Eudicots  | <i>Rosaceae</i>         | X | X |   | 3   |
| <i>Rubus fruticosus</i>        | Magnoliophyta  | Eudicots  | <i>Rosaceae</i>         | X | X |   | 3   |
| <i>Rubus idaeus</i>            | Magnoliophyta  | Eudicots  | <i>Rosaceae</i>         | X | X |   | 3   |
| <i>Rubus saxatilis</i>         | Magnoliophyta  | Eudicots  | <i>Rosaceae</i>         | X | X |   | 3   |
| <i>Rumex conglomeratus</i>     | Magnoliophyta  | Eudicots  | <i>Polygonaceae</i>     | X | X |   | 2   |
| <i>Salix purpurea</i>          | Magnoliophyta  | Eudicots  | <i>Salicaceae</i>       | X |   |   | 2   |
| <i>Salvia pratensis</i>        | Magnoliophyta  | Eudicots  | <i>Lamiaceae</i>        | X | X |   | 2   |
| <i>Salvia verticillata</i>     | Magnoliophyta  | Eudicots  | <i>Lamiaceae</i>        | X | X |   | 2   |
| <i>Saponaria officinalis</i>   | Magnoliophyta  | Eudicots  | <i>Caryophyllaceae</i>  | X | X |   | 2   |
| <i>Senecio fuchsii</i>         | Magnoliophyta  | Eudicots  | <i>Asteraceae</i>       | X | X |   | 2   |
| <i>Senecio ovatus</i>          | Magnoliophyta  | Eudicots  | <i>Asteraceae</i>       | X | X |   | 2   |
| <i>Sesleria varia</i>          | Magnoliophyta  | Monocots  | <i>Poaceae</i>          | X | X |   | 1   |
| <i>Solanum tuberosum</i>       | Magnoliophyta  | Eudicots  | <i>Solanaceae</i>       |   |   | X | 7   |
| <i>Solidago virgaurea</i>      | Magnoliophyta  | Eudicots  | <i>Asteraceae</i>       | X | X |   | 2   |
| <i>Stachys sylvatica</i>       | Magnoliophyta  | Eudicots  | <i>Lamiaceae</i>        | X | X |   | 2   |
| <i>Thymus serpyllum</i>        | Magnoliophyta  | Eudicots  | <i>Lamiaceae</i>        | X | X |   | 2   |
| <i>Tilia cordata</i>           | Magnoliophyta  | Eudicots  | <i>Malvaceae</i>        | X |   |   | 2   |
| <i>Tragopogon orientalis</i>   | Magnoliophyta  | Eudicots  | <i>Asteraceae</i>       | X | X |   | 2   |
| <i>Trifolium pratense</i>      | Magnoliophyta  | Eudicots  | <i>Fabaceae</i>         | X | X |   | 2   |

|                              |               |          |                   |   |   |   |     |
|------------------------------|---------------|----------|-------------------|---|---|---|-----|
| <i>Triticum</i>              | Magnoliophyta | Monocots | <i>Poaceae</i>    | X | X | X | 1,7 |
| <i>Urtica dioica</i>         | Magnoliophyta | Eudicots | <i>Urticaceae</i> | X | X |   | 2   |
| <i>Vaccinium myrtillus</i>   | Magnoliophyta | Eudicots | <i>Ericaceae</i>  | X | X |   | 3   |
| <i>Vaccinium uliginosum</i>  | Magnoliophyta | Eudicots | <i>Ericaceae</i>  | X | X |   | 3   |
| <i>Vaccinium vitis-idaea</i> | Magnoliophyta | Eudicots | <i>Ericaceae</i>  | X | X |   | 3   |
| <i>Vicia sepium</i>          | Magnoliophyta | Eudicots | <i>Fabaceae</i>   | X | X |   | 2   |
| <i>Zea mays</i>              | Magnoliophyta | Monocots | <i>Poaceae</i>    | X | X | X | 1,7 |

\*Notes: 1 – Grasses and sedges, 2 – Herbaceous plants and leaves of deciduous trees, 3 – Genera *Rubus*, *Rosa*, *Vaccinium*, 4 – Needles, 5 – Wood and bark, 6 – Ferns and mosses 7 – Seeds and fruits.
